# Supplementary material for: Salidroside Protects Dopaminergic Neurons by Enhancing PINK1/Parkin-Mediated Mitophagy
Source: Hindawi journal article supplement (doi:10.1155/2019/9341018), 2019-09-10
Supplement: f1 [file 9341018.f1.pdf]

# Supplementary Materials

Figure S1

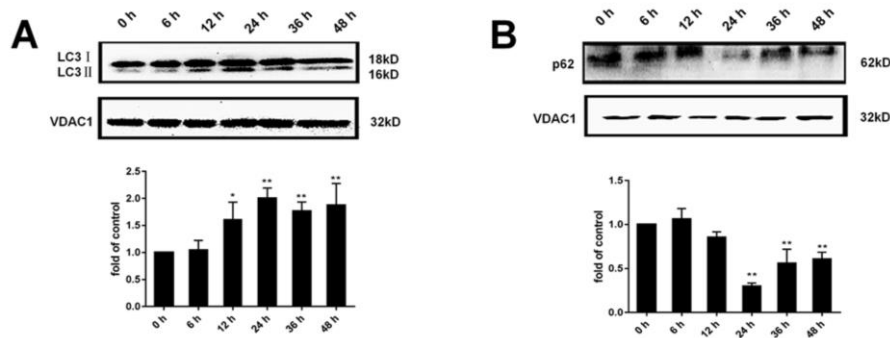

**Figure S1** Effect of MPP<sup>+</sup> on the autophagic flux in the mitochondria of MN9D cells. (A) Western blot of the LC3 II/LC3 I ratio and (B) p62 expression in the mitochondria of MN9D cells treated with 200  $\mu$ M of MPP<sup>+</sup> for the indicated time points. VDAC1 served as loading controls. Each column represents the mean  $\pm$  SD (n=3). \*P < 0.05 and \*\*P < 0.01, compared with the control group.

Figure S1

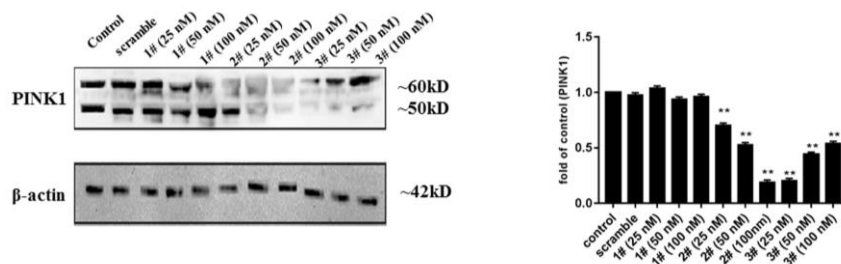

**Figure S2** Protein expression of PINK1 after transfecting with various concentration of siRNA for 72 h. Si-PINK1 (2#, 100 nM) was used for the following experiments. Each column represents the mean  $\pm$  SD (n=3). \*\*P < 0.01, compared with the control group.
